# Supplementary material for: Metabolic subtypes and immune landscapes in esophageal squamous cell carcinoma: prognostic implications and potential for personalized therapies
Source: Springer Nature journal article supplement (doi:10.1186/s12885-024-11890-x), 2024-02-19
Supplement: MOESM3 [file 26749438]

Figure 6B

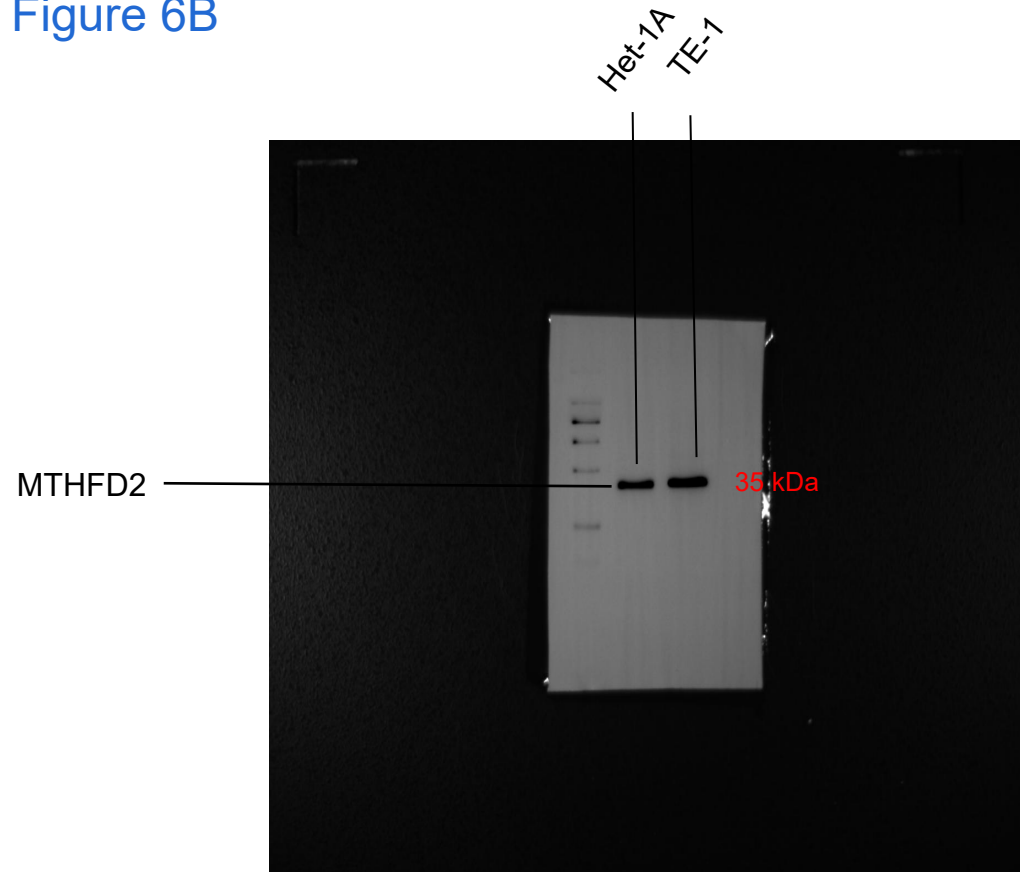

The original Western Blot images of MTHFD2 in Figure 6B. From left to right: Het-1A, TE-1.

Figure 6B

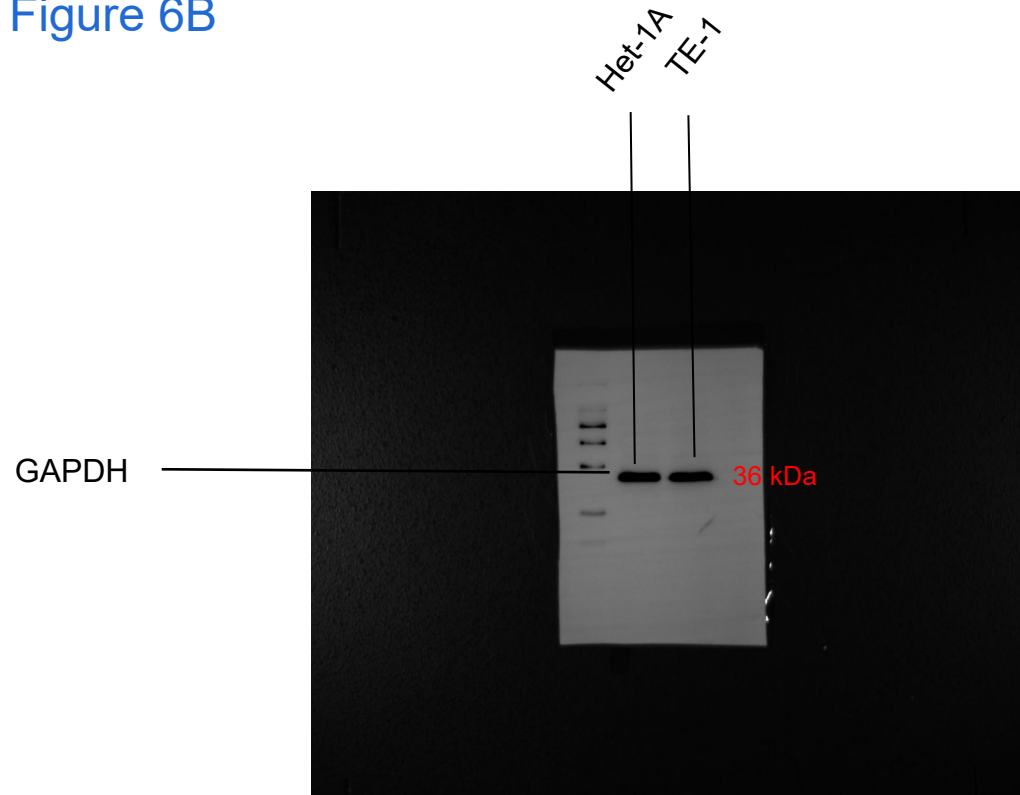

The original Western Blot images of GAPDH in Figure 6B. From left to right: Het-1A, TE-1.

Figure 7B

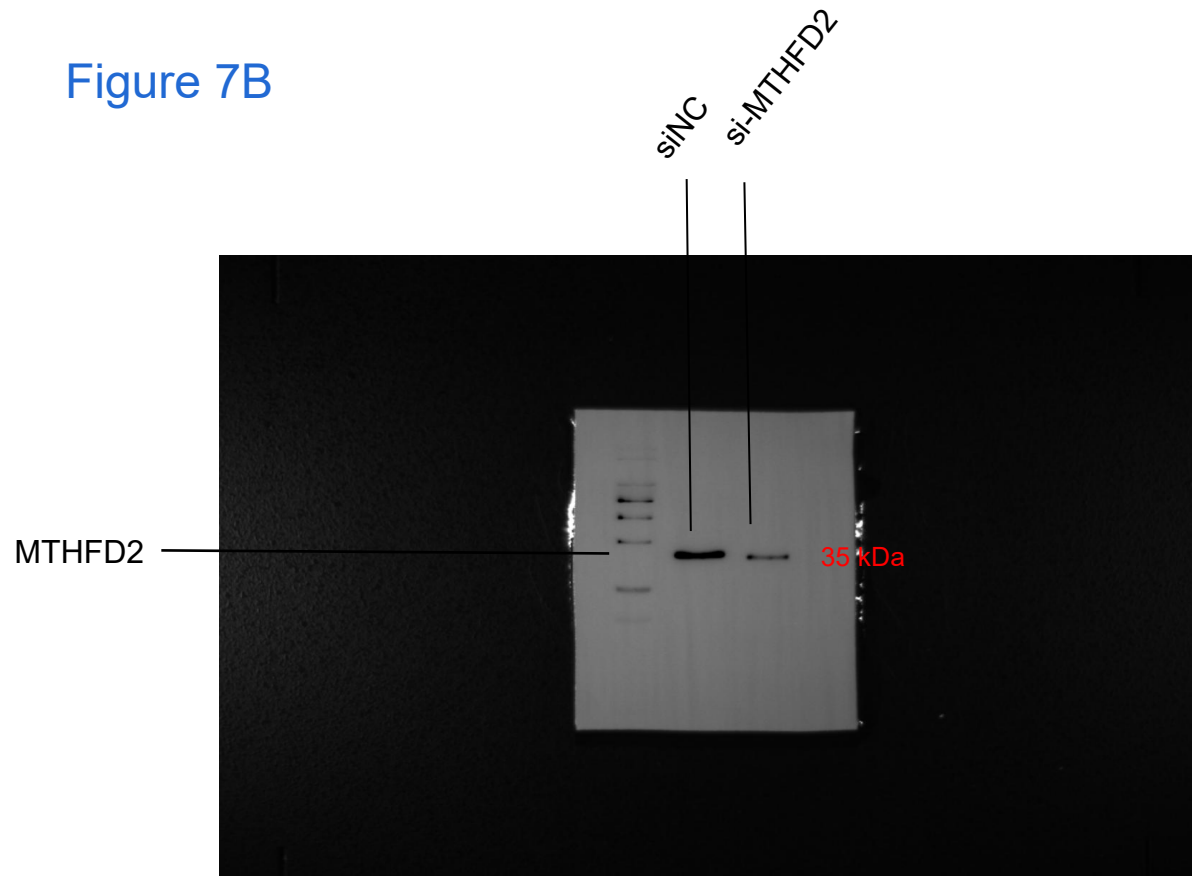

The original Western Blot images of MTHFD2 in Figure 7B. From left to right: siNC, si-MTHFD2.

Figure 7B

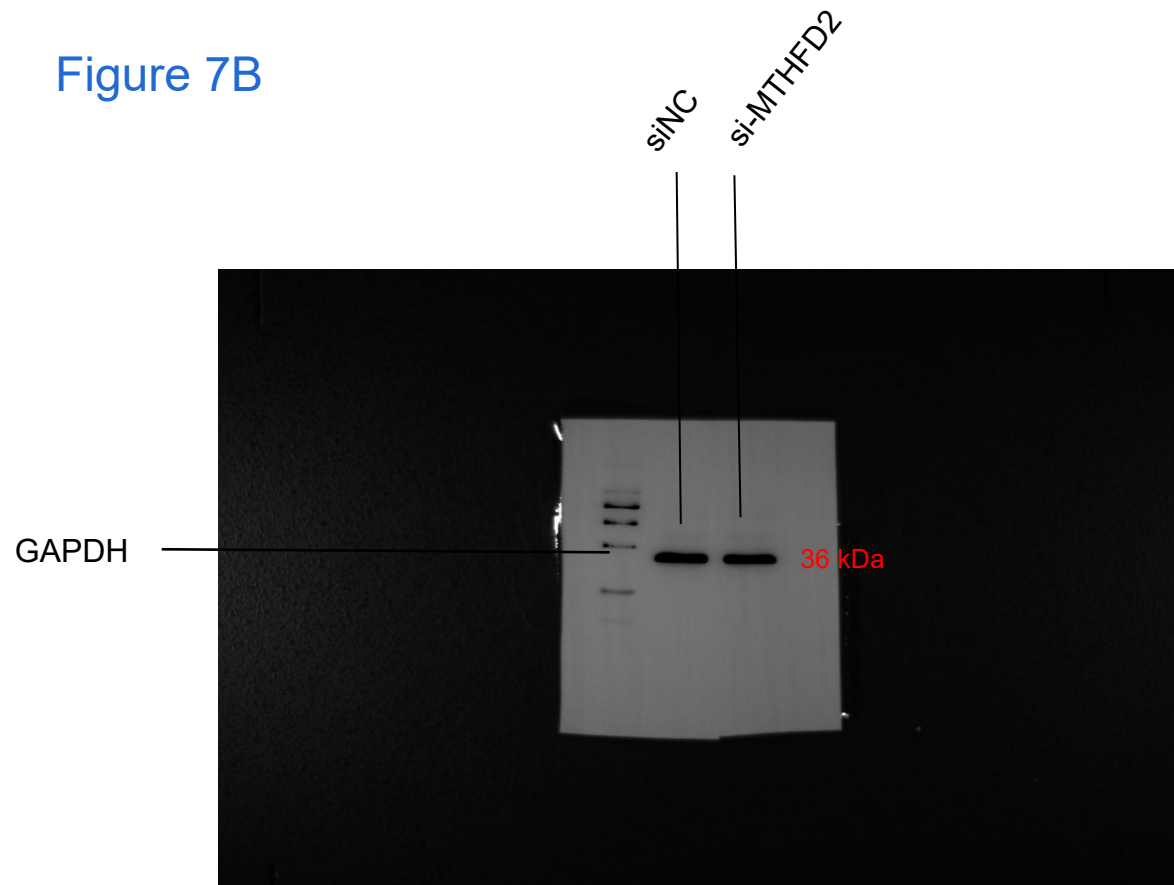

The original Western Blot images of GAPDH in Figure 7B. From left to right: siNC, si-MTHFD2.
